# Supplementary material for: Complete Genome Sequence of Elephant Endotheliotropic Herpesvirus 4, the First Example of a GC-Rich Branch Proboscivirus
Source: PubMed Central journal article supplement (PMC4911795; doi:10.1128/msphere.00081-15), 2016-06-15
Supplement: sph003162095st1.pdf [file sph003162095st1.pdf]

**Table S1: Detailed Differences Between PCR Sequenced Regions of EEHV4A(NAP22) and EEHV4B(Baylor)**

| Gene/ORF Name/No.                                                                   | HCMV ORF | HSV ORF | Ori-ent | Protein Name | Position No | Gene Size | Protein Size | Genbank Acc * | Status | EEHV4B(Baylor) Coordinates | Nucl Diff |
|-------------------------------------------------------------------------------------|----------|---------|---------|--------------|-------------|-----------|--------------|---------------|--------|----------------------------|-----------|
| EEHV4[NAP22]: Seventeen segments. Total = 30,134-bp Differences = 2,684 bp (= 8.8%) |          |         |         |              |             |           |              |               |        |                            |           |
| -                                                                                   |          |         |         |              | 00001-00155 | (155)     |              | KT832478      | -      | 15016- 17080               | 138       |
| E4A                                                                                 | Nil      | Nil     | F       |              | 00156-00629 | 573       | 157          |               | Novel  |                            |           |
| E4B                                                                                 | Nil      | Nil     | F       |              | 00688-01581 | 894       | 297          |               | Novel  |                            |           |
| E4C                                                                                 | Nil      | Nil     | F       |              | 01784-02082 | (299)     | (100)        |               | Novel  |                            |           |
| E7                                                                                  | Nil      | Nil     | R       |              | 00596-00001 | (596)     | (199)        | KU147235      | Novel  | 20067- 26664               | 791       |
| E7A                                                                                 | Nil      | Nil     | R       |              | 01569-00793 | 776       | 259          |               | Novel  |                            |           |
| E9                                                                                  | Nil      | Nil     | R       |              | 02567-01683 | 884       | 294          |               | Novel  |                            |           |
| E9A                                                                                 | Nil      | Nil     | F       | vOGT         | 02911-04161 | 1260      | 419          |               | Novel  |                            |           |
| E9B-C                                                                               | Nil      | Nil     | R       |              | 05161-04205 | 956       | 318          |               | Novel  |                            |           |
| E10A                                                                                | Nil      | Nil     | R       |              | 06006-05125 | 881       | 293          |               | Novel  |                            |           |
| E11                                                                                 | Nil      | Nil     | R       |              | 06597-06296 | (693)     | (231)        |               | Novel  |                            |           |
| E12                                                                                 | Nil      | Nil     | R       |              | 00173-00001 | (173)     | (58)         | KT832481      | Novel  | 28145- 28877               | 12        |
| E12A                                                                                | Nil      | Nil     | R       |              | 00406-00140 | 267       | 88           |               | Novel  |                            |           |
| -                                                                                   |          |         |         |              | 00407-00734 | (327)     |              |               | -      |                            |           |
| E16                                                                                 | Nil      | Nil     | R       |              | 00054-00001 | (54)      | (14)         | KT832482R     | Novel  | 35518- 37300               | 51        |
| E16D                                                                                | Nil      | Nil     | R       | vECTL1       | 00624-00067 | 528       | 175          |               | Novel  |                            |           |
| E17                                                                                 | Nil      | Nil     | F       |              | 00974-01309 | 335       | 112          |               | Novel  |                            |           |
| E17A                                                                                | Nil      | Nil     | F       |              | 01426-01731 | 306       | 101          |               | Novel  |                            |           |
| E18                                                                                 | Nil      | Nil     | F       |              | 01694-01731 | (47)      | (16)         |               | -      |                            |           |
| -                                                                                   |          |         |         |              | 00001-00214 |           |              | KT832484      | -      | 38220- 38996               | 15        |
| E18C                                                                                | Nil      | Nil     | F       |              | 00215-00502 | 288       | 95           |               | Novel  |                            |           |
| -                                                                                   |          |         |         |              | 00503-00779 | (276)     |              |               | -      |                            |           |
| E20B                                                                                | Nil      | Nil     | R       |              | 00148-00001 | (148)     | (49)         | KT832485      | Novel  | 44302- 45485               | 16        |
| E20A                                                                                | Nil      | Nil     | F       |              | 00163-00582 | 420       | 140          |               | Novel  |                            |           |
| -                                                                                   |          |         |         |              | 00582-01168 | (586)     |              |               | -      |                            |           |
| -                                                                                   |          |         |         |              | 00001-00043 | (43)      |              | KT832486R     | -      | 48950- 50247               | 24        |
| E23B                                                                                | Nil      | Nil     | R       |              | 00376-00044 | 333       | 110          |               | Novel  |                            |           |
| E24Bex2                                                                             | Nil      | Nil     | R       | vOX2-B       | 00650-00301 | (349)     | 116          |               | Novel  |                            |           |
| E24Bex1                                                                             | Nil      | Nil     | R       | vOX2-B       | 01058-01007 | (51)      | (17)         |               | Novel  |                            |           |
| -                                                                                   |          |         |         |              | 01059-01304 | (145)     |              |               | -      |                            |           |
| E31A                                                                                | Nil      | Nil     | R       |              | 00051-00001 | (51)      | (17)         | KT832487      | Novel  | 56874- 57869               | 107       |
| E31Bex                                                                              | Nil      | Nil     | R       |              | 00758-00300 | 458       | 152          |               | Novel  |                            |           |
| E32                                                                                 | Nil      | Nil     | R       |              | 00974-00828 | (146)     | (48)         |               | Novel  |                            |           |
| U39                                                                                 | UL55     | UL29    | F       | gB           | 00001-01621 | (1621)    | (538)        | KT832479R     | Core   | 99801-101407               | 199       |
| U38                                                                                 | UL54     | UL30    | F       | POL          | 00001-01236 | (1236)    | (412)        | JN983935*     | Core   | 103620-104855              | 7         |
| U27                                                                                 | UL44     | UL42    | F       | PPF          | 00001-00013 | (14)      | (3)          | KT832488      | Core   | 131010-135957              | 1094      |
| E35A/U45.7                                                                          | Nil      | Nil     | F       | ORF-J        | 00126-00776 | 651       | 216          |               | Novel  |                            |           |
| U46                                                                                 | UL73     | UL49A   | F       | gN           | 00788-01087 | 300       | 99           |               | Core   |                            |           |
| U47                                                                                 | UL74     | Nil     | R       | gO           | 01863-01181 | 678       | 225          |               | Core   |                            |           |
| U48                                                                                 | UL75     | UL22    | R       | gH           | 04059-01792 | 2268      | 755          |               | Core   |                            |           |
| U48.5/ORF-H                                                                         | Nil      | UL23    | R       | TK           | 04913-04019 | (895)     | (297)        |               | α/γ/δ  |                            |           |
| U50                                                                                 | UL       | UL      | F       | PAC2         | 00001-00190 | (190)     | (59)         | KT832480R     | Core   | 138150-139828              | 186       |

|   |           |         |      |   |        |             |        |       |           |                        |               |    |
|---|-----------|---------|------|---|--------|-------------|--------|-------|-----------|------------------------|---------------|----|
| 4 | U51       | UL78    | Nil  | F | vGPCR1 | 00278-01498 | 1220   | 406   |           | $\beta\delta$          |               |    |
| 5 | -         | -       | -    |   |        | 01499-01681 | 182    | -     |           |                        |               |    |
| 6 |           |         |      |   |        |             |        |       |           |                        |               |    |
| 7 | U60ex3    | UL89ex2 | UL15 | R | TERex3 | 00316-00001 | (316)  | (106) | EU658935* | Core                   | 155043-155358 | 0  |
| 8 |           |         |      |   |        |             |        |       |           |                        |               |    |
| 9 | U70       | UL98    | UL12 | F | EXO    | 00001-00041 | (41)   | (13)  | JN983097* | Core                   | 166054-169365 | 26 |
| 0 | U71       | UL99    | UL11 | F | myrTeg | 00001-00289 | (289)  | (96)  |           | Core                   |               |    |
| 1 | U72       | UL100   | UL10 | R | gM     | 01603-00485 | 1118   | 372   |           | Core                   |               |    |
| 2 | U73/ORF-G | Nil     | U109 | F | OBP    | 02109-03314 | (1205) | (401) |           | $\alpha/\beta2/\delta$ |               |    |
| 3 |           |         |      |   |        |             |        |       |           |                        |               |    |
| 4 | U76       | UL104   | UL06 | R | POR    | 00311-00001 | (311)  | (104) | JN983099* | Core                   | 176440-177316 | 4  |
| 5 | U77       | UL105   | UL05 | F | HEL    | 00262-00877 | (616)  | (205) |           | Core                   |               |    |
| 6 |           |         |      |   |        |             |        |       |           |                        |               |    |
| 7 | U81       | UL114   | UL02 | R | UDG    | 00545-00001 | (545)  | (142) | KT832489  | Core                   | 184361-184901 | 12 |
| 8 |           |         |      |   |        |             |        |       |           |                        |               |    |
| 9 | E40/U84.5 | Nil     | Nil  | R | ORF-K  | 00264-00001 | (264)  | (88)  | KT832490  | Novel                  | 194110-194728 | 2  |
| 0 |           |         |      |   |        | 00263-00619 | (356)  |       |           | -                      |               |    |
| 1 |           |         |      |   |        |             |        |       |           |                        |               |    |

2 \*Genbank accession file numbers for all Sanger PCR sequenced loci of EEHV4A(NAP22). The four loci  
3 marked with \* were published previously (11). The complete 205,896-bp genome of EEHV4(Baylor =  
4 NAP69) has accession number KT832477. Novel = Proposed *Deltaherpesvirus* specific genes and ORFs.
